# Swimming direction of the Glass Catfish, *Kryptopterus bicirrhys*, is responsive to magnetic stimulation

Ryan D. Hunt<sup>1,3</sup>, Ryan C. Ashbaugh<sup>1,3,6</sup>, Mark Reimers<sup>3,5</sup>, Lalita Udpa<sup>6</sup>, Gabriela Saldana De Jimenez<sup>3</sup>, Michael Moore<sup>3,5</sup>, Assaf A. Gilad<sup>1,2,4</sup>, Galit Pelled<sup>1,2,3</sup>

1. Department of Biomedical Engineering, Michigan State University, USA
2. Department of Radiology, Michigan State University, USA
3. Neuroengineering Division, Institute for Quantitative Health Science and Engineering, Michigan State University, USA
4. Synthetic Biology Division, Institute for Quantitative Health Science and Engineering, Michigan State University, USA
5. Department of Physiology and Neuroscience Program, Michigan State University, East Lansing, USA
6. Department of Electrical and Computer Engineering, Michigan State University, East Lansing, MI, USA

Corresponding Author:

Galit Pelled, Ph.D.

Michigan State University

[Pelledga@msu.edu](mailto:Pelledga@msu.edu)

Tel: 517-884-7464

**Key words:** Magnetoreception, neuromodulation, behavior, fish, artificial intelligence, machine learning

## SUMMARY

Throughout evolution, organisms have developed unique strategies to become more competitive in their environment. One unique adaptation is the ability to sense magnetic fields, i.e., magnetoreception. While animals like salmonids, pigeons, eels and sea turtles use magnetoreception to migrate over thousands of kilometers [1-10], non-migratory fish species have also shown evidence of magnetoreception [11, 12]. The freshwater fish, *Kryptopterus bicirrhys* is known to be sensitive to the Earth's magnetic field [13-15]. Recently, we have discovered a gene (electromagnetic perceptive gene (EPG)) that is expressed in *K. bicirrhys*'s ampullary organ and is specifically activated in response to magnetic stimuli. This genetic-based magnetoreception has a great potential as a neuromodulation technology and as a valuable tool to study neural behavior from the molecular to network levels [15-17]. However, the mechanism by which magnetoreception manifests and functions is not well understood [18-24]. This work was designed to understand the natural behavior of *K. bicirrhys* in response to magnetic fields. We capitalized on new concepts of artificial intelligence as well as traditional video tracking algorithms to quantify how *K. bicirrhys* responds to magnetic stimulation with high spatial and temporal resolution. The results demonstrate that *K. bicirrhys* placed in a radial maze, consistently swim away from magnetic fields over 20  $\mu$ T and show adaptability to changing magnetic field directions and locations. This work will be invaluable to further understand the mechanisms and possible cellular interactions of EPG once a knock-out EPG in *K. bicirrhys* is achieved.

## METHODS

All animal procedures were conducted in accordance with the NIH Guide for the Care and Use of Laboratory Animals and approved by the Michigan State University Institutional Animal Care and Use Committee.

*K. bicirrhys* were imported from Thailand to the United States and housed in a standard 30-gallon fish tank with a 12-hour day/night cycle with water maintained at 27 degrees. Water quality was checked daily for ammonium and nitrate. Fish were fed a diet of fresh hatched brine shrimp twice per day. All experiments were conducted between the hours of 11 am and 4 pm to eliminate behavioral changes due to feeding and light cycle.

The Y-maze's arms were 60 cm long and 10 cm wide with a central area of 10x10x10 cm (AnyMaze 60280). One week prior to starting experiments all fish were transitioned from their tanks to the radial Y-maze. The same fish were used for all experiments (one fish died between constant location of stimulus and changing location of stimulus experiments). The magnetic stimulus and the sham stimulus were placed 10 cm from the end of an arm, inside of the maze. Each trial was recorded for 30 minutes by overhead cameras while the experimenter was out of the room. Each trial was repeated four times for each condition for a total of 24 trials.

A permanent Neodymium Rare Earth Magnet with a horizontal magnetic flux of 577 mT at the magnet's surface was placed 10 cm from the end of one of the Y-maze arms. The strength of the magnetic field induced by the magnet was calculated by COMSOL (Figure 1). A sham stimulus was made from plastic and aluminum foil, with similar dimensions to the magnet. All recordings were analyzed by a radial-maze tracking software written in Matlab by Delcourt *et al.* [25]. Videos were taken originally in AnyMaze format and converted to .mp4. The Matlab program then created a background image by

taking an average of 100 frames. Fish location was determined by subtracting the background image from each frame, remaining pixels with a grey scale value higher than threshold were given a value of 1, continuous pixels with a value of 1 were labeled as a fish. The spatial resolution of all videos was  $3.57 \pm .52$  pixels/cm and were recorded at 30 frames per second. Data is reported as mean  $\pm$  standard deviation.

In a separate set of experiments, a single fish was selected from the same school and placed in the center of the Y-maze. Two trials of magnet and sham conditions were conducted: one set of trials was used for computer training, and the other for analysis using the trained software. DeepLabCut [26, 27] was used to track the location of a single fish in the Y-maze. The program was initially trained on 20 frames and ran through 1,300,000 iterations. After initial training, outlier frames were extracted and re-labeled. The program was re-trained with the addition of the outlier frames for 100,000 iterations. Retraining was done three times until visual inspection and expected error were satisfactory ( $\pm 15$  pixels). DeepLabCut results were extracted using an output CSV file from the code, which provides the x,y coordinates of the tracked fish for every frame of the video. This file was exported to R-Studio and plotted as a standard scatter plot and overlaid on a Y-maze diagram. Tracked videos are two minutes and fifty seconds long (5,100 frames).

## RESULTS

### Constant location of stimulus

We characterized fish behavior as a response to a magnetic stimulation that was consistently present at the same location. In these sets of experiments the magnet was always placed in Arm 1 of the Y-maze. The initial location of the fish school was changed randomly to one of the Y-maze's three arms. Each trial was repeated four times for each arm for a total of 24 trials. The number of fish present in Arm 1 (Arm with magnet) was significantly lower than the number of fish in the other two arms in the first minute (Arm 1-Magnet,  $1.24 \pm .1.16$ ; Arm 2 & 3-No Magnet,  $5.16 \pm 3.23$ ;  $P = < .0005$ , unpaired T-Test), after 5 minutes (Arm 1-Magnet,  $1.14 \pm .91$ ; Arm 2 & 3-No Magnet,  $5.37 \pm 3.38$ ;  $P = < .0005$ , unpaired T-Test), and over the entire recording that lasted 30 minutes (Arm 1-Magnet,  $1.08 \pm .96$ ; Arm 2 & 3-No Magnet,  $5.02 \pm 3.49$ ;  $P = < .0005$ , unpaired T-Test). When the initial fish location was also in Arm 1, the school immediately swam away from that arm and stayed away. In contrast, when the sham stimulus was placed in Arm 1, the fish did not show any preference to any of the three arms after 1 minute, (Arm 1-Sham,  $2.26 \pm .1.85$ ; Arm 2 & 3-No Sham,  $3.81 \pm 3.42$ ;  $P = < .0005$  unpaired T-Test), after 5 minutes, (Arm 1-Sham,  $2.34 \pm 1.95$ ; Arm 2 & 3-No Sham,  $3.96 \pm .3.12$ ;  $P = < .0005$  unpaired T-Test), and after 30 minutes, (Arm 1-Sham,  $2.07 \pm 1.82$ ; Arm 2 & 3-No Sham,  $4.13 \pm 3.12$ ;  $P = < .005$  unpaired T-Test). Between experiments we also see that fish spend significantly less time in Arm 1 when the magnet is present compared to when the sham is present at all time points ( $p < .0005$ , unpaired T-Test). These experiments showed that *K. bicirrhos* prefer to avoid swimming in water with a magnetic strength over 20  $\mu T$  (Figure 1c and 2).

### Changing location of stimulus

We then sought to determine if fish behavior changed with the location of the magnetic stimulation. In this set of experiments the fish school was barricaded in the middle of the Y-maze, and the magnetic or sham stimuli were placed randomly in one of

the arms (Figure 1b). After barricade removal the fish swam away from the magnet and explored the two other maze-arms. In line with previous experiments, fish spent significantly less time in an arm when the magnet was present compared to when the sham stimulus was present (Arm 1-Magnet,  $1.58 \pm .95$ , Arm 1-Sham,  $3.76 \pm 1.97$ ; Arm 2-Magnet,  $1.39 \pm .99$ , Arm 2-Sham,  $3.37 \pm 1.29$ ; Arm 3-Magnet,  $6.63 \pm 1.29$ , Arm 3-Sham,  $8.53 \pm 1.11$ ;  $P = < .005$ , Unpaired T-Test). Figure 3 shows the number of fish present in each arm within the first 5 minutes of recording.

For the purpose of individual swim pattern analysis, one fish was placed in the middle of the Y-maze. Once the barricade had been removed the fish swam across two arms where no magnet was present but exhibited a clear avoidance from the arm containing the magnet. We used a state-of-the-art artificial intelligence approach, DeepLabCut [26, 27] to track the fish's swimming path. DeepLabCut was successfully trained on a single fish with an error of less than 4.2 cm or 15 pixels. Figure 4 shows that magnetic stimulation results in an individual fish swimming away from the magnet immediately after barricade removal. Consistent with previous results, sham stimulus did not induce an avoidance behavior.

## DISCUSSION

Several marine species have developed a magnetic perception that is useful in navigation and the detection of prey and predators [6, 28], for review see [29-31]; animals such as sharks and platypus, use magnetoreception for prey detection [32-36]. Others, like ants [37], use this sense for predator avoidance and the nematode, *Caenorhabditis elegans* uses magnetoreception for vertical navigation in soil [38]. Even cattle have been shown to align themselves with electromagnetic pulses [39]. The freshwater fish, *K. bicirrhys*. *K. bicirrhys* is a transparent fish found in slow moving rivers of South East Asia where visibility is low [40, 41]. It appears plausible that in these types of conditions, magnetic perception is an advantageous trait to conserve. However, the mechanisms allowing magnetic sensation remain largely unknown [21, 31]. We have used state-of-the-art software based on artificial intelligence object tracking algorithms to characterize *K. bicirrhys* behavioral response to magnetic fields. The results indicate that *K. bicirrhys* consistently swim away from magnetic fields over 20  $\mu$ T and show adaptability to changing magnetic field direction and location. In addition, our results show that this magnetic avoidance behavior is not influenced by school behavior.

We have previously demonstrated that the modulatory effects of magnetic stimulation on mammalian cells transfected with EPG was induced by magnetic fields of 50 mT [16]. However, in this experiment we see that fish are significantly more sensitive to magnetic fields than transfected cells, with fish starting to exhibit avoidance behavior at  $\sim 20$   $\mu$ T (Figures 2 and 3). While the pathway by which EPG modulates calcium channels is unknown [15, 16] it is possible that there are accessory proteins unknown to the authors, which amplify magneto-sensitivity in *K. bicirrhys*. Currently, we can only evoke a cellular response by using strong magnetic fields in culture ( $> 50$  mT). However, the Earth's magnetic field is only 30  $\mu$ T-60  $\mu$ T, and yet, is readily detected by *K. bicirrhys*. One of the major challenges in EPG's development as a neuromodulatory technology is the attenuation of magnetic fields over distance. If the biological amplification properties of *K. bicirrhys* is uncovered, this technology could be used to treat deep brain afflictions without the need for surgery.

Using AI such as DeepLabCut can be transformative to animal behavior studies. Using this method, we could follow the swimming pattern of an individual fish, over thousands of frames with extremely high spatial and temporal resolution. Another advantage is the machine learning components of AI. The more trials run through DeepLabCut, the more efficient and accurate it becomes at tracing animals in similar situations. However, the transparency of *K. bicirrhys* caused detection difficulties with DeepLabCut and recording hardware when rapid movement caused insufficient contrast between the fish and Y-maze. In Figure 4b, during the sham stimulus the fish swam at a gradual pace throughout the maze. However, during magnetic stimulus the fish tend to stay in one area then dash to the end of an arm and back. During these rapid movements there was not enough contrast for the software to detect the fish. Once the fish slowed down and the contrast was restored, the tracking became accurate.

We have established that *K. bicirrhys* has unique magnetic field sensing capabilities that position it as a valuable model to study magnetoreception in animal species. The cellular mechanisms allowing this capability remains to be determined. We have already identified and cloned the EPG from *K. bicirrhys*. But is this the only magnetic-sensitive protein? Does it work with other proteins to amplify and modulate its activity? Do other animal species that have been shown to be sensitive to magnetic fields have similar proteins? This animal model can provide unprecedented preparation to address these questions. By characterizing the behavior of *K. bicirrhys* we are now working towards developing a fish with a knock-out in the EPG gene. This will elucidate if there are additional genes associated with magnetic responses and will facilitate the development of the next generation of additional magnetic sensing molecular tools.

## ACKNOWLEDGMENTS

This work was supported by National Institutes of Health grants R01NS072171 and R01NS098231.

## AUTHORS CONTRIBUTIONS

RDH and GP designed all experiments and wrote the manuscript. RDH and GSDJ performed experiments. RDH, RCA, MM, MR, AG and GP analysed the data. RCA and LU performed the magnetic measurements, and related analysis.

## DECLARATION OF INTEREST

The authors declare no competing interests.

**Figure 1.** Diagram of the experimental set up. A. Constant location of stimulus-The magnet was always placed in the same arm and the fish were barricaded randomly in one of the three arms. B. Changing location of stimulus- The magnet was randomly placed in one of the three arms, and fish were always barricaded in the center of the Y-maze. C. COSMOL stimulation depicting the strength of the magnetic field induced by the magnet.

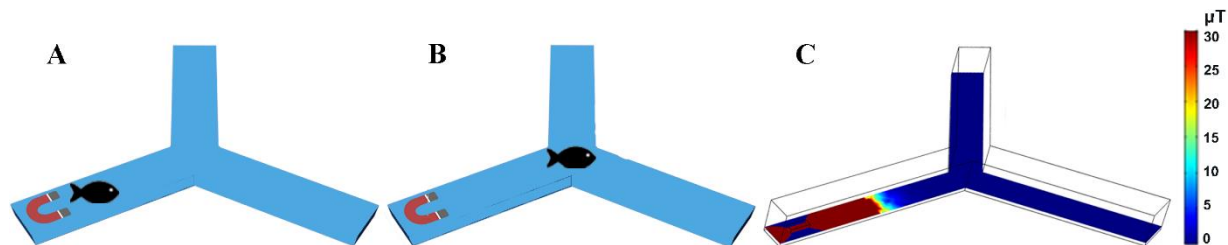

**Figure 2.** A: The average number of fish in each arm over the first minute and five minutes in constant location of stimulus experiments. B: Distribution of fish over first minute and five minutes of experiment, red line indicates median value, outliers shown are >95% CI. The magnet and sham object were kept in Arm 1 across all trials. Results indicate that regardless of the initial location of the fish, they tend to avoid Arm 1 when magnet was present compared to sham (\*\*\*)  $p < .0005$ .

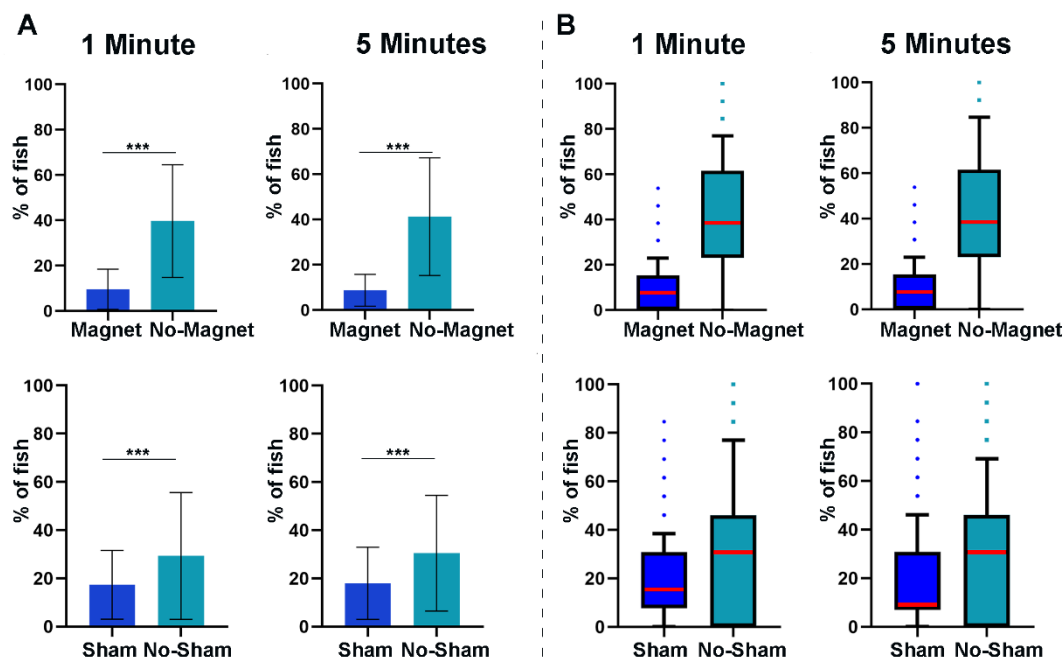



**Figure 3:** The average number of fish in each arm over the five minutes in changing location of stimulus experiments. There is a significant decrease in number of fish between magnetic stimulus and sham in every arm of the y-maze (\*\* $p < .0005$ ).

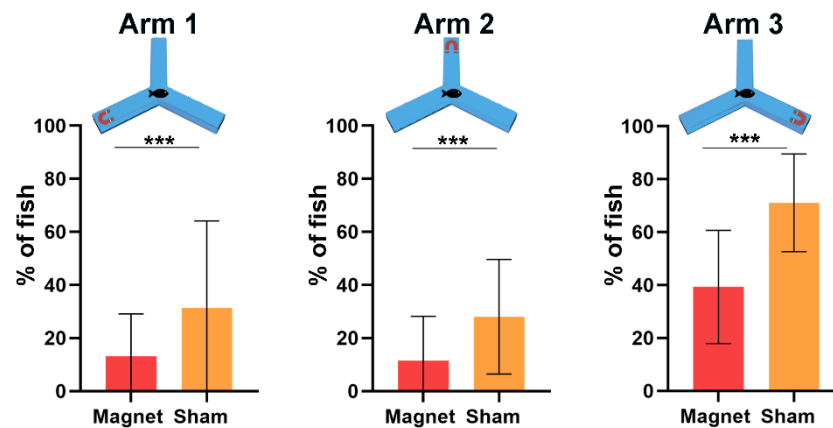

**Figure 4:** DeepLabCut tracking of a single fish. A. Experimental set up. B. Sham, C. magnet. The fish position is shown here over every frame for 170 s (5,100 frames). Individual values were exported and plotted using R and overlaid on a Y-maze diagram.

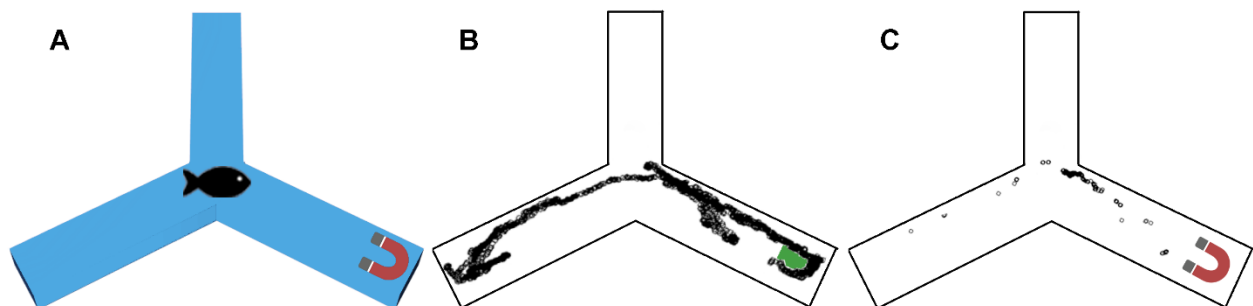

## REFERENCES

1. Henrik, M. (2018). Long-distance navigation and magnetoreception in migratory animals. *Nature*; London 558, 50-59.
2. Wynn, J., Padget, O., Mouritsen, H., Perrins, C., and Guilford, T. (2020). Natal imprinting to the Earth's magnetic field in a pelagic seabird. *Current Biology* 30, 2869-2873.e2862.
3. Brothers, J.R., and Lohmann, Kenneth J. (2015). Evidence for Geomagnetic Imprinting and Magnetic Navigation in the Natal Homing of Sea Turtles. *Current Biology* 25, 392-396.
4. Wiltschko, R., and Wiltschko, W. (2019). Magnetoreception in birds. *J R Soc Interface* 16, 20190295-20190295.
5. Benhamou, S., Sudre, J., Bourjea, J., Ciccione, S., De Santis, A., and Luschi, P. (2011). The role of geomagnetic cues in green turtle open sea navigation. *PloS one* 6, e26672-e26672.
6. Putman, N.F., Jenkins, E.S., Michielsens, C.G.J., and Noakes, D.L.G. (2014). Geomagnetic imprinting predicts spatio-temporal variation in homing migration of pink and sockeye salmon. *J R Soc Interface* 11, 20140542.
7. Winklhofer, M. (2019). Magnetoreception: A Dynamo in the Inner Ear of Pigeons. *Current Biology* 29, R1224-R1226.
8. Naisbett-Jones, L.C., Putman, N.F., Stephenson, J.F., Ladak, S., and Young, K.A. (2017). A Magnetic Map Leads Juvenile European Eels to the Gulf Stream. *Current Biology* 27, 1236-1240.
9. Beason, R.C., Wiltschko, R., and Wiltschko, W. (1997). Pigeon homing: Effects of magnetic pulses on initial orientation. *The Auk* 114, 405-415.
10. Wiltschko, W., and Wiltschko, R. (2005). Magnetic orientation and magnetoreception in birds and other animals. *Journal of Comparative Physiology A* 191, 675-693.
11. Hart, V., Kušta, T., Němec, P., Bláhová, V., Ježek, M., Nováková, P., Begall, S., Červený, J., Hanzal, V., Malkemper, E.P., et al. (2012). Magnetic Alignment in Carps: Evidence from the Czech Christmas Fish Market. *PloS one* 7, e51100.
12. Brown, H.R., and Ilyinsky, O.B. (1978). The ampullae of Lorenzini in the magnetic field. *Journal of comparative physiology* 126, 333-341.
13. H.W. Lissmann, K.E.M. (1963). Electric Receptors in a Non-electric Fish (*Clarias*). *Nature* 199, 88-89.
14. Wachtel, A.W., and Szamier, R.B. (1969). Special cutaneous receptor organs of fish. IV. Ampullary organs of the nonelectric catfish, *Kryptopterus*. *Journal of morphology* 128, 291-308.
15. Krishnan, V., Park, S.A., Shin, S.S., Alon, L., Tressler, C.M., Stokes, W., Banerjee, J., Sorrell, M.E., Tian, Y., Fridman, G.Y., et al. (2018). Wireless control of cellular function by activation of a novel protein responsive to electromagnetic fields. *Scientific reports* 8, 8764.
16. Hwang, J., Choi, Y., Lee, K., Krishnan, V., Pelled, G., Gilad, A.A., and Choi, J. (2020). Regulation of Electromagnetic Perceptive Gene Using Ferromagnetic Particles for the External Control of Calcium Ion Transport. *Biomolecules* 10, 308.
17. Cywiak, C., Ashbaugh, R.C., Metto, A.C., Udpa, L., Qian, C., Gilad, A.A., Zhong, M., and Pelled, G. (2019). Non-invasive neuromodulation using rTMS and the Electromagnetic-Perceptive Gene (EPG) facilitates plasticity after nerve injury. *bioRxiv*, 851444.



18. Winklhofer, M., and Kirschvink, J.L. (2010). A quantitative assessment of torque-transducer models for magnetoreception. *Journal of The Royal Society Interface* 7, S273-S289.
19. Walker, M.M. (2008). A model for encoding of magnetic field intensity by magnetite-based magnetoreceptor cells. *Journal of Theoretical Biology* 250, 85-91.
20. Ritz, T., Adem, S., and Schulten, K. (2000). A model for photoreceptor-based magnetoreception in birds. *Biophys J* 78, 707-718.
21. Gregory, N.T., Hochstoeger, David, Keays (2017). Magnetoreception-A sense without a receptor. *PLoS biology* 15, e2003234.
22. Hore, P.J., and Mouritsen, H. (2016). The Radical-Pair Mechanism of Magnetoreception. *Annual review of biophysics* 45, 299-344.
23. Bernd Fritsch, H.S. (2015). Evolution of vertebrate mechanosensory hair cells and inner ears: toward identifying stimuli that select mutation driven altered morphologies. *J Comp Physiol A Neuroethol Sens Neural Behav physiol* 200, 5-18.
24. Eder, S.H., Gigler, A.M., Hanzlik, M., and Winklhofer, M. (2014). Sub-micrometer-scale mapping of magnetite crystals and sulfur globules in magnetotactic bacteria using confocal Raman micro-spectrometry. *PloS one* 9, e107356.
25. Delcourt, J., Miller, N.Y., Couzin, I.D., and Garnier, S. (2018). Methods for the effective study of collective behavior in a radial arm maze. *Behavior research methods* 50, 1673-1685.
26. Mathis, A., Mamidanna, P., Cury, K.M., Abe, T., Murthy, V.N., Mathis, M.W., and Bethge, M. (2018). DeepLabCut: markerless pose estimation of user-defined body parts with deep learning. *Nature Neuroscience* 21, 1281-1289.
27. Nath, T., Mathis, A., Chen, A.C., Patel, A., Bethge, M., and Mathis, M.W. (2019). Using DeepLabCut for 3D markerless pose estimation across species and behaviors. *Nature Protocols* 14, 2152-2176.
28. Hutchison, Z.L., Gill, A.B., Sigray, P., He, H., and King, J.W. (2020). Anthropogenic electromagnetic fields (EMF) influence the behaviour of bottom-dwelling marine species. *Scientific reports* 10, 4219.
29. Krzysztof Formicki, A.K.O., Adam Tański (2019). Magnetoreception in fish. *Journal of Fish Biology* 95, 73-91.
30. Johnsen, S., and Lohmann, K.J. (2005). The physics and neurobiology of magnetoreception. *Nature Reviews Neuroscience* 6, 703-712.
31. Lohmann, K.J. (2010). Magnetic-field perception. *Nature* 464, 1140-1142.
32. Johnsen, S., and Lohmann, K.J. (2008). Magnetoreception in animals. *Physics Today* 61, 29-35.
33. Babineau, D., Lewis, J.E., and Longtin, A. (2007). Spatial acuity and prey detection in weakly electric fish. *PLoS Comput Biol* 3, e38-e38.
34. Fishelson, L., and Baranes, A. (1998). Distribution, morphology, and cytology of ampullae of Lorenzini in the Oman shark, *Iago omanensis* (Triakidae), from the Gulf of Aqaba, Red Sea. *The Anatomical Record* 251, 417-430.
35. Manger, P.R., Pettigrew, J.D., Fjällbrant, T.T., Manger, P.R., and Pettigrew, J.D. (1998). Some related aspects of platypus electroreception: temporal integration behaviour, electroreceptive thresholds and directionality of the bill acting as an antenna. *Philosophical Transactions of the Royal Society of London. Series B: Biological Sciences* 353, 1211-1219.
36. Manger, P.R., and Pettigrew, J.D. (1995). Electroreception and the feeding behaviour of platypus (*Ornithorhynchus anatinus*: Monotremata: Mammalia). *Philosophical Transactions of the Royal Society of London. Series B: Biological Sciences* 347, 359-381.

37. de Oliveira, J.F., Wajnberg, E., Esquivel, D.M.d.S., Weinkauff, S., Winklhofer, M., and Hanzlik, M. (2010). Ant antennae: are they sites for magnetoreception? *J R Soc Interface* 7, 143-152.
38. Vidal-Gadea, A., Ward, K., Beron, C., Ghorashian, N., Gokce, S., Russell, J., Truong, N., Parikh, A., Gadea, O., Ben-Yakar, A., et al. (2015). Magnetosensitive neurons mediate geomagnetic orientation in *Caenorhabditis elegans*. *Elife* 4, e07493.
39. Burda, H., Begall, S., Červený, J., Neef, J., and Němec, P. (2009). Extremely low-frequency electromagnetic fields disrupt magnetic alignment of ruminants. *Proceedings of the National Academy of Sciences* 106, 5708.
40. Han, J.E., Choresca, C.H., Koo, O.J., Oh, H.J., Hong, S.G., Kim, J.H., Shin, S.P., Jun, J.W., Lee, B.C., and Park, S.C. (2011). Establishment of glass catfish (*Kryptopterus bicirrhys*) fin-derived cells. *Cell Biol Int Rep* (2010) 18, e00008-e00008.
41. Ng, H.H., and Kottelat, M. (2013). After eighty years of misidentification, a name for the glass catfish (Teleostei: Siluridae). *Zootaxa* 3630, 308-316.
